# Supplementary material
Source: PubMed Central journal article supplement (PMC2846207)
Supplement: NIHMS168881-supplement-1_si_001.pdf [file NIHMS168881-supplement-1_si_001.pdf]

## Supporting Information

### Hydroxylated Sclerosporin Derivatives from the Marine-derived Fungus *Cadophora malorum*<sup>†</sup>

Celso Almeida,<sup>‡</sup> Ekaterina Eguereva,<sup>‡</sup> Stefan Kehraus,<sup>‡</sup> Carsten Siering<sup>§</sup> and Gabriele M. König<sup>‡</sup>

<sup>†</sup>Dedicated to the late Dr. John W. Daly of NIDDK, NIH, Bethesda, Maryland and to the late Dr. Richard E. Moore of the University of Hawaii at Manoa for their pioneering work on bioactive natural products.

<sup>‡</sup>*Institute for Pharmaceutical Biology, University of Bonn*

<sup>§</sup>*Kekulé-Institute for Organic Chemistry and Biochemistry, University of Bonn*

- Figure S1.  $^1\text{H}$  NMR spectrum (300 MHz,  $\text{CDCl}_3$ ) of compound **2**
- Figure S2.  $^{13}\text{C}$  NMR spectrum (75 MHz,  $\text{CDCl}_3$ ) of compound **2**
- Figure S3.  $^1\text{H}$  NMR spectrum (300 MHz,  $\text{CDCl}_3$ ) of compound **3**
- Figure S4.  $^{13}\text{C}$  NMR spectrum (75 MHz,  $\text{CDCl}_3$ ) of compound **3**
- Figure S5.  $^1\text{H}$  NMR spectrum (300 MHz, acetone- $d_6$ ) of compound **4**
- Figure S6.  $^{13}\text{C}$  NMR spectrum (75 MHz, acetone- $d_6$ ) of compound **4**
- Figure S7.  $^1\text{H}$  NMR spectrum (300 MHz, acetone- $d_6$ ) of compound **5**
- Figure S8.  $^{13}\text{C}$  NMR spectrum (75 MHz, acetone- $d_6$ ) of compound **5**
- Figure S9. Infra red spectra of compounds **1-5**
- Figure S10. HREIMS for compound **2**
- Figure S11. HREIMS for compound **3**
- Figure S12. HREIMS for compound **4**
- Figure S13. HREIMS for compound **5**
- Figure S14. HREIMS for compound **1** (sclerosporin)
- Figure S15. Key HMBC correlations for compounds **2-5**
- Figure S16. Key NOE correlations for compounds **2-5**
- Figure S17. CD spectra for compounds **1-5**; respective absolute configuration on the right side
- Figure S18. Isolation scheme for compounds **1 – 5**
- Table S19. Data of the 3T3-L1 murine adipocytes assay for compound **5**
- Table S20. 1D and 2D NMR Spectroscopic Data for Compound **2** [(+)-15-hydroxysclerosporin]
- Table S21. 1D and 2D NMR Spectroscopic Data for Compound **3** [(+)-12-hydroxysclerosporin]
- Table S22. 1D and 2D NMR Spectroscopic Data for Compound **4** [(+)-11-hydroxysclerosporin]
- Table S23. 1D and 2D NMR Spectroscopic Data for Compound **5** [(-)-8-hydroxysclerosporin]

Figure S1.  $^1\text{H}$  NMR spectrum (300 MHz,  $\text{CDCl}_3$ ) of compound **2**

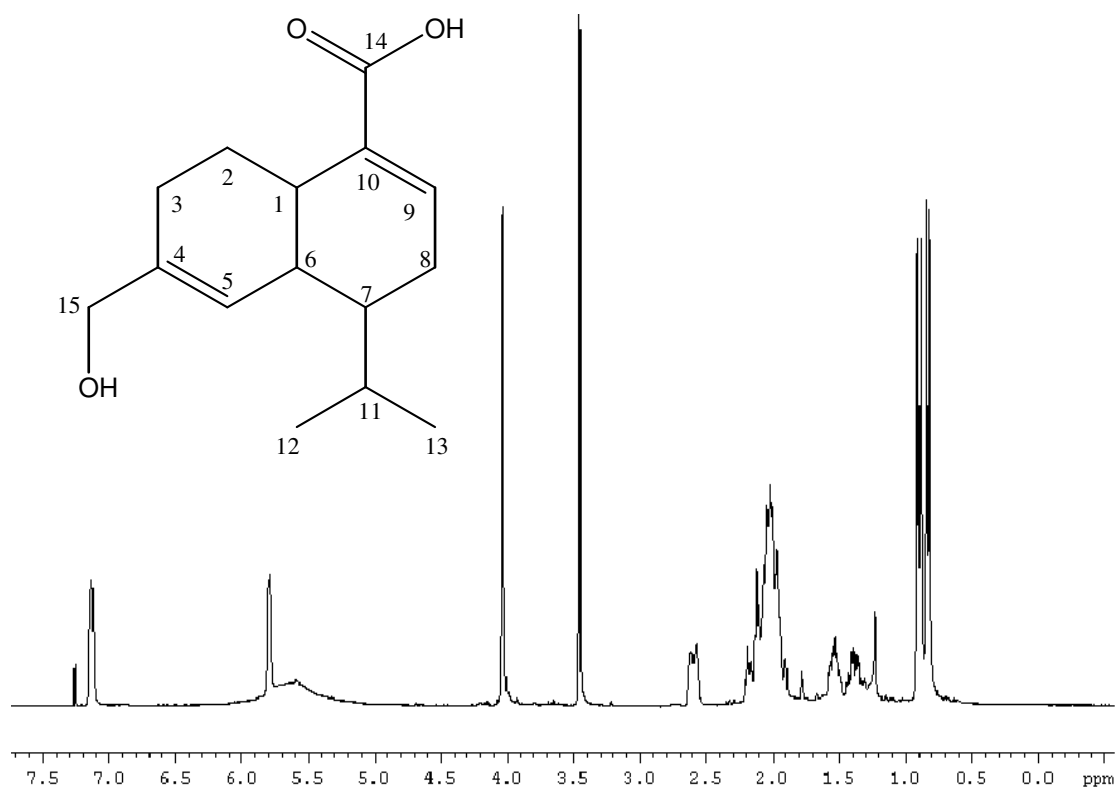

Figure S2.  $^{13}\text{C}$  NMR spectrum (75 MHz,  $\text{CDCl}_3$ ) of compound **2**

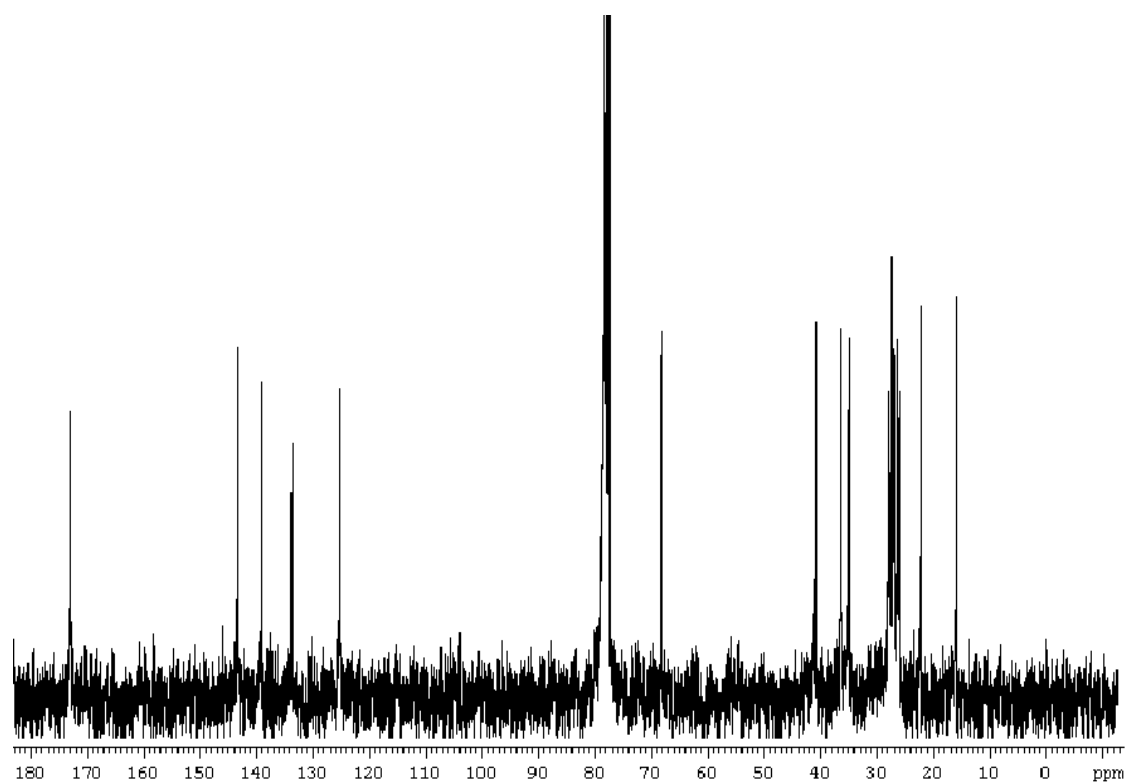

Figure S3.  $^1\text{H}$  NMR spectrum (300 MHz,  $\text{CDCl}_3$ ) of compound **3**

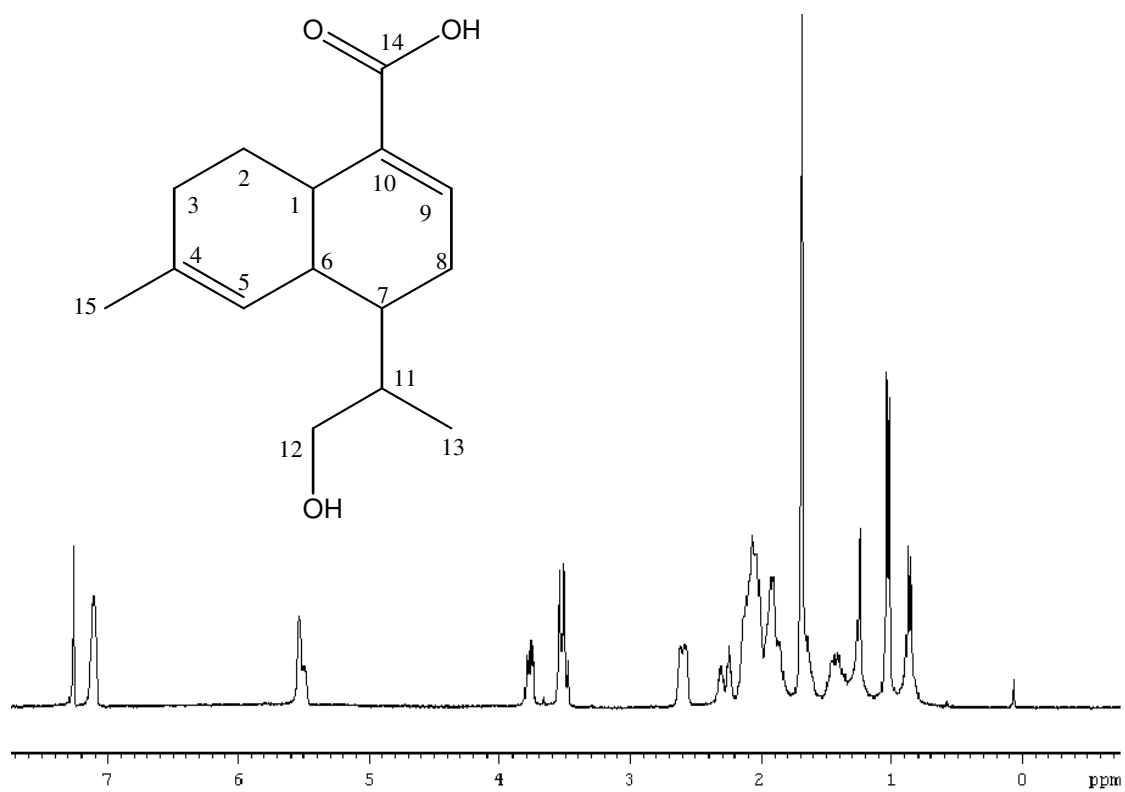

Figure S4.  $^{13}\text{C}$  NMR spectrum (75 MHz,  $\text{CDCl}_3$ ) of compound **3**

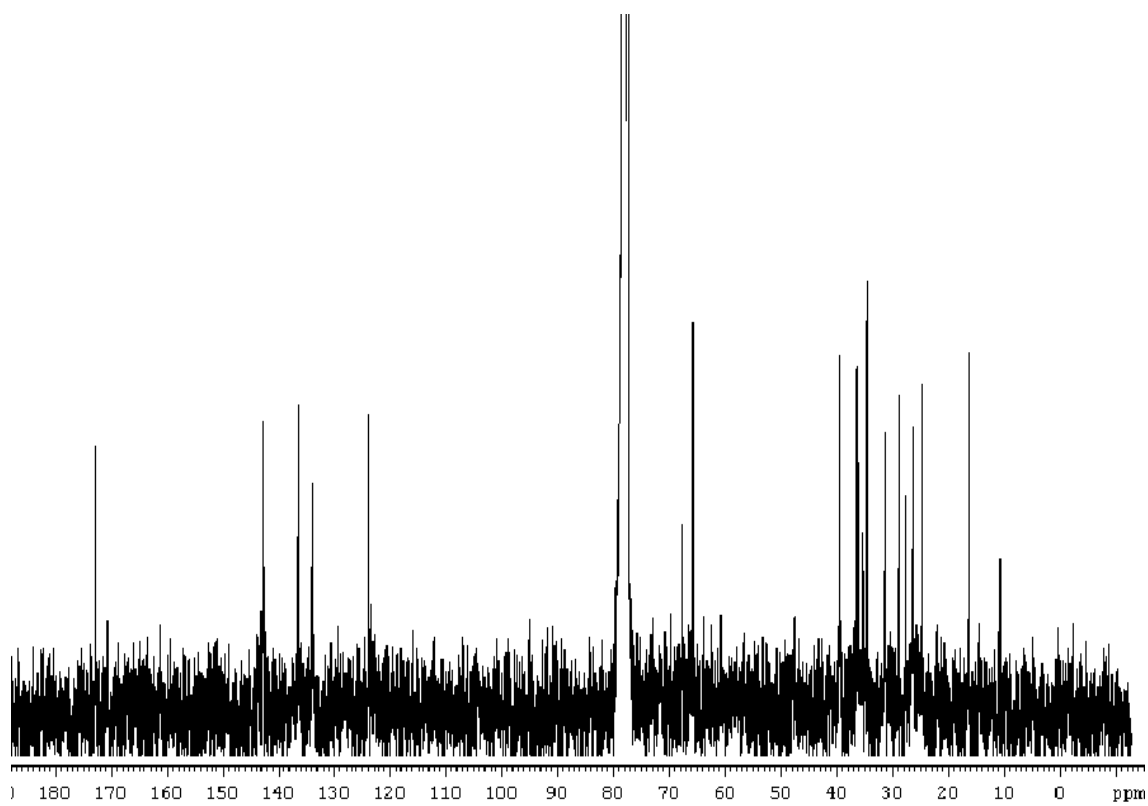

Figure S5.  $^1\text{H}$  NMR spectrum (300 MHz, acetone- $d_6$ ) of compound **4**

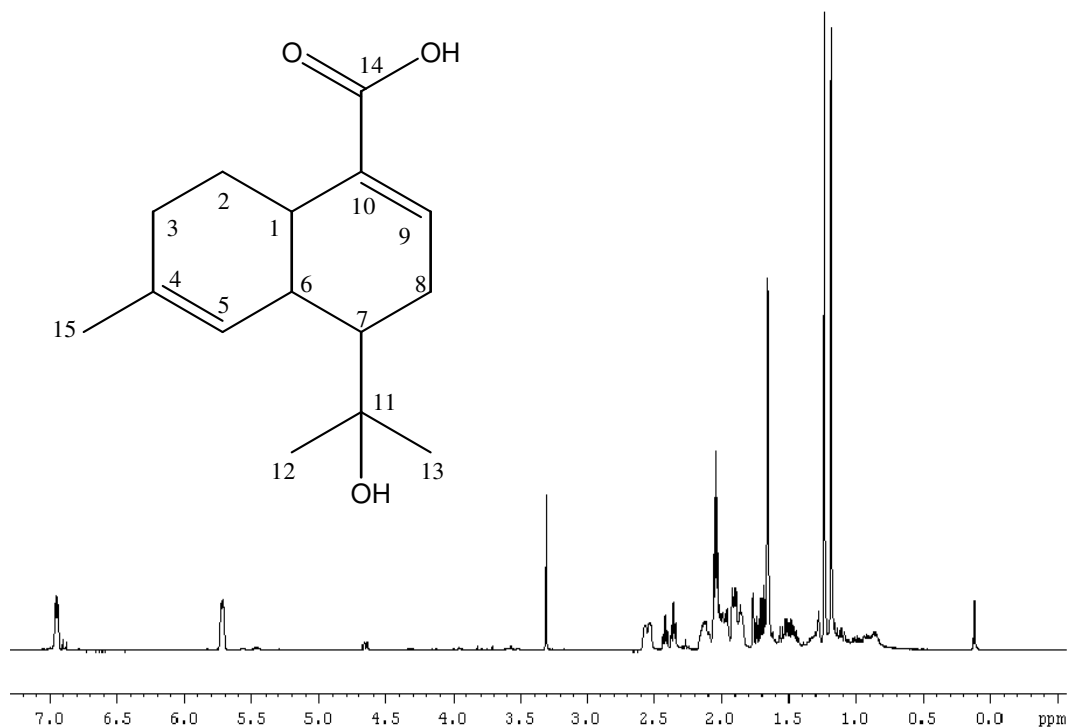

Figure S6.  $^{13}\text{C}$  NMR spectrum (75 MHz, acetone- $d_6$ ) of compound **4**

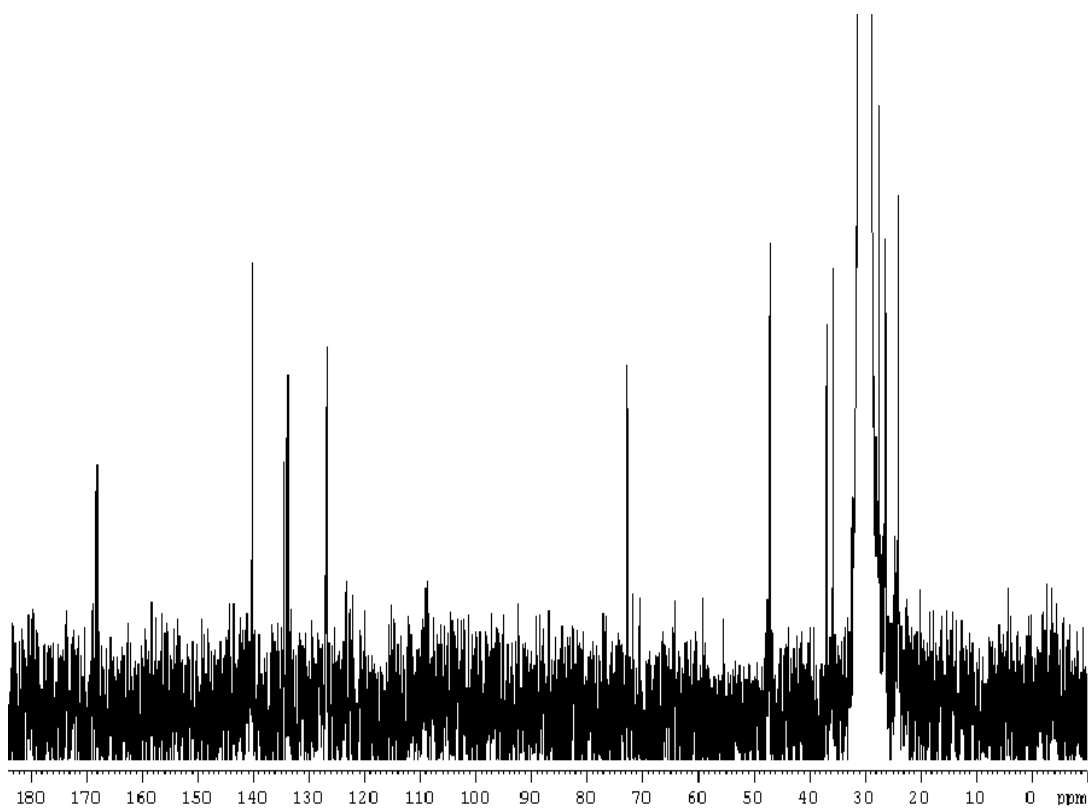

Figure S7.  $^1\text{H}$  NMR spectrum (300 MHz, acetone- $d_6$ ) of compound **5**

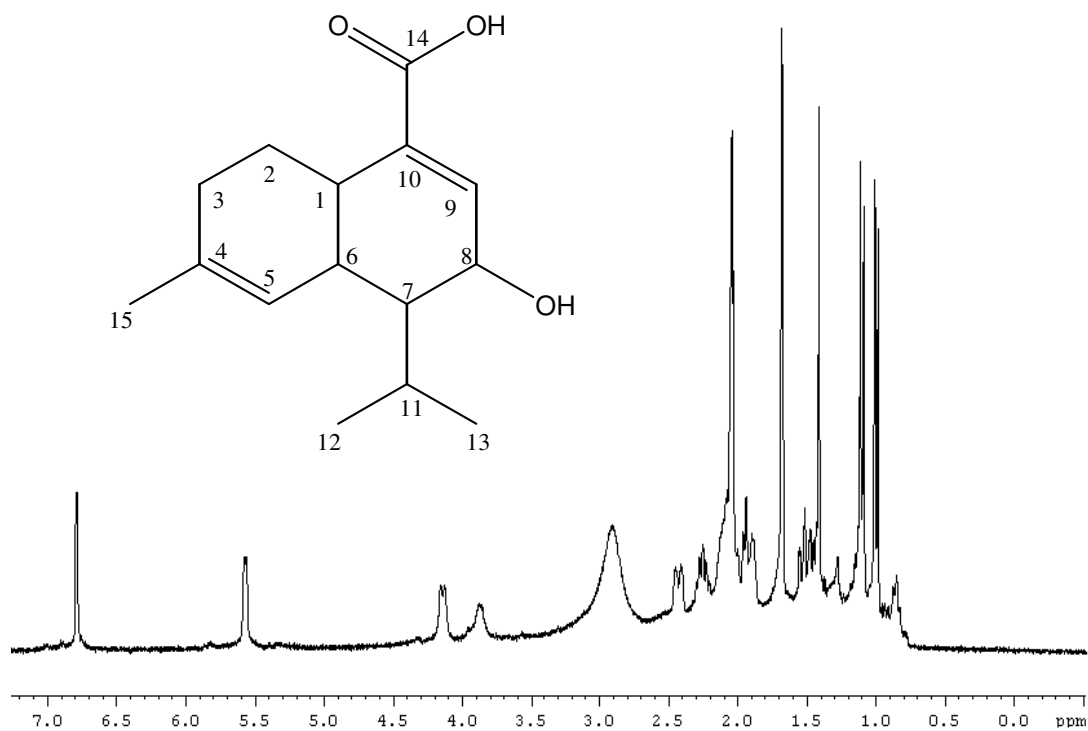

Figure S8.  $^{13}\text{C}$  NMR spectrum (75 MHz, acetone- $d_6$ ) of compound **5**

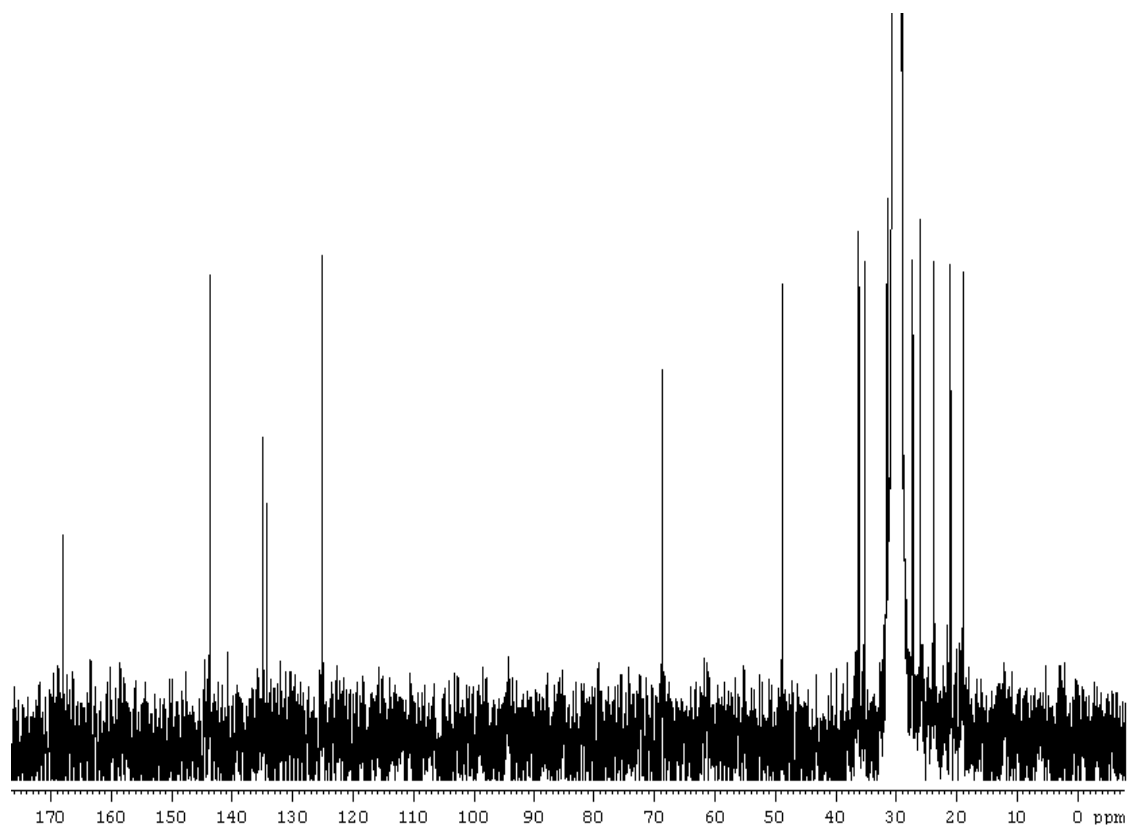

Figure S9. Infra-red spectra of compounds 1-5

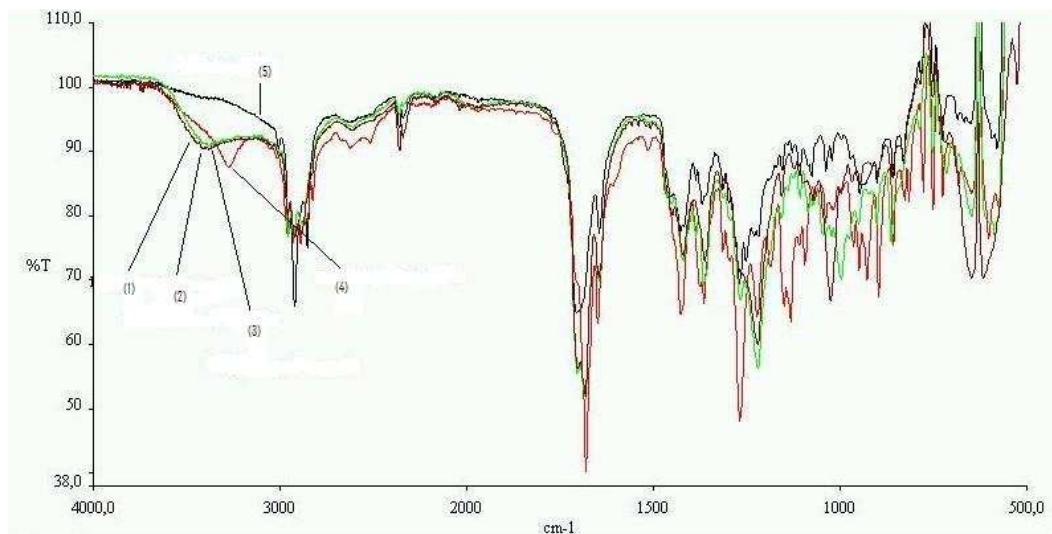

Figure S10. HREIMS for compound 2

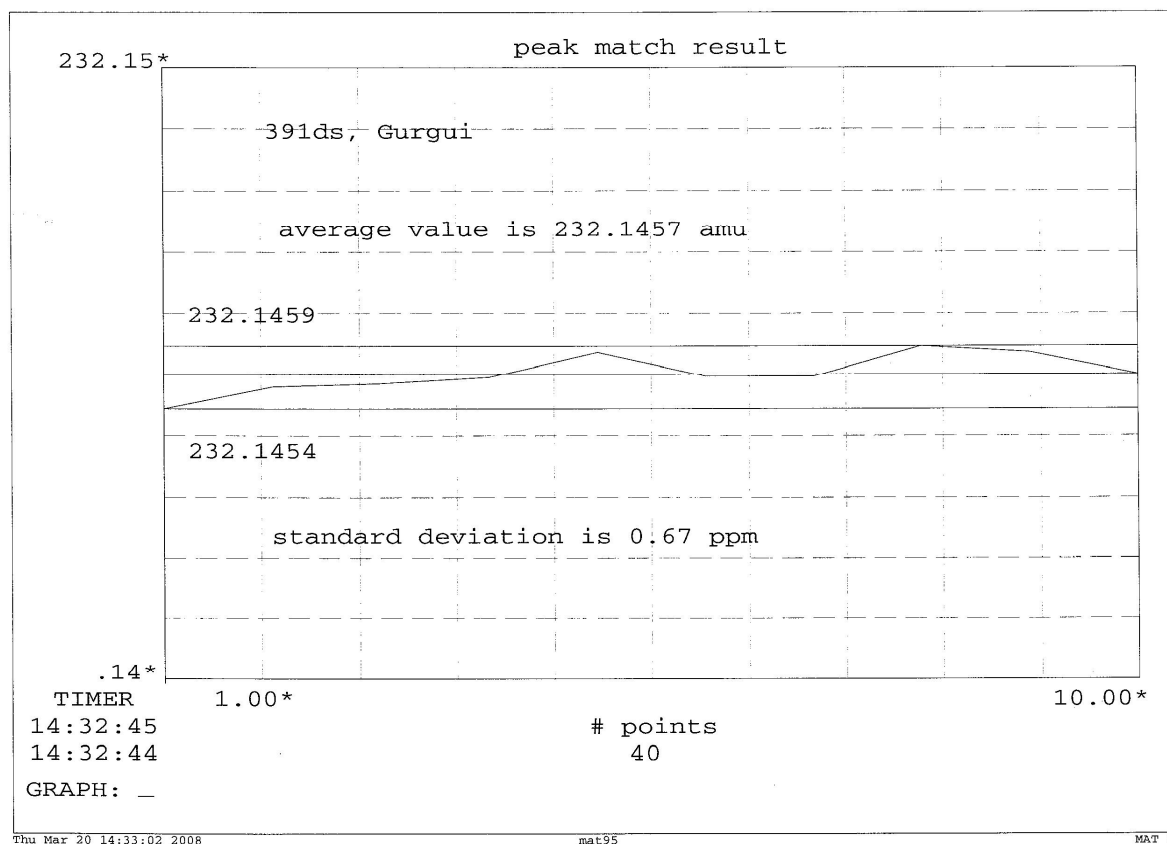

Figure S11. HREIMS for compound 3

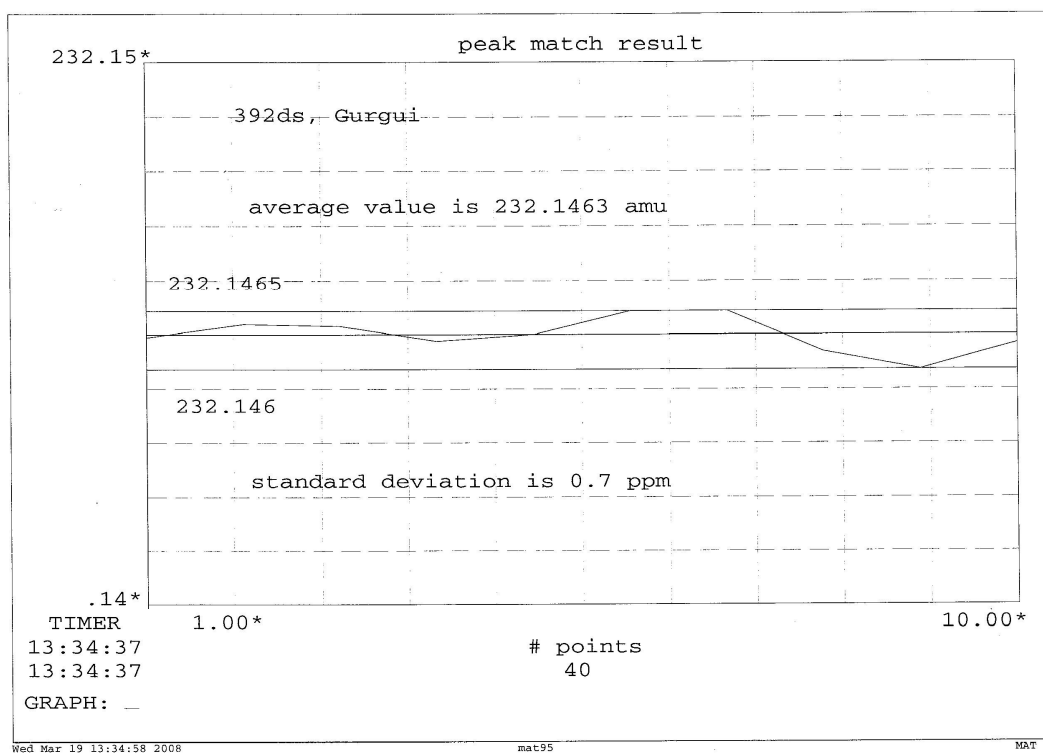

Figure S12. HREIMS for compound 4

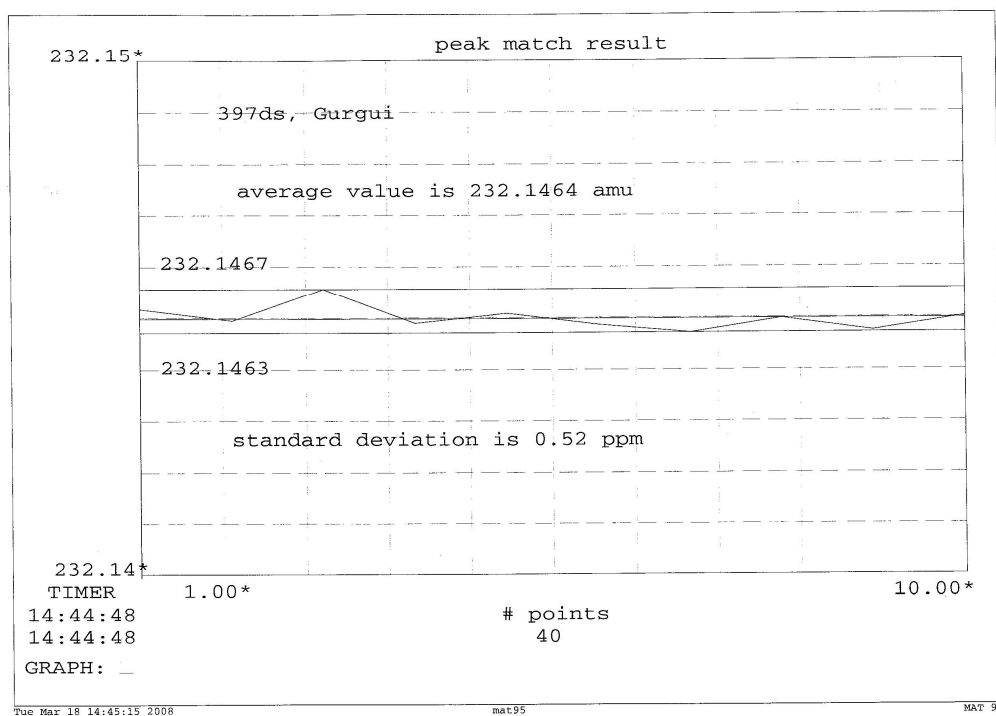



Figure S13. HREIMS for compound 5

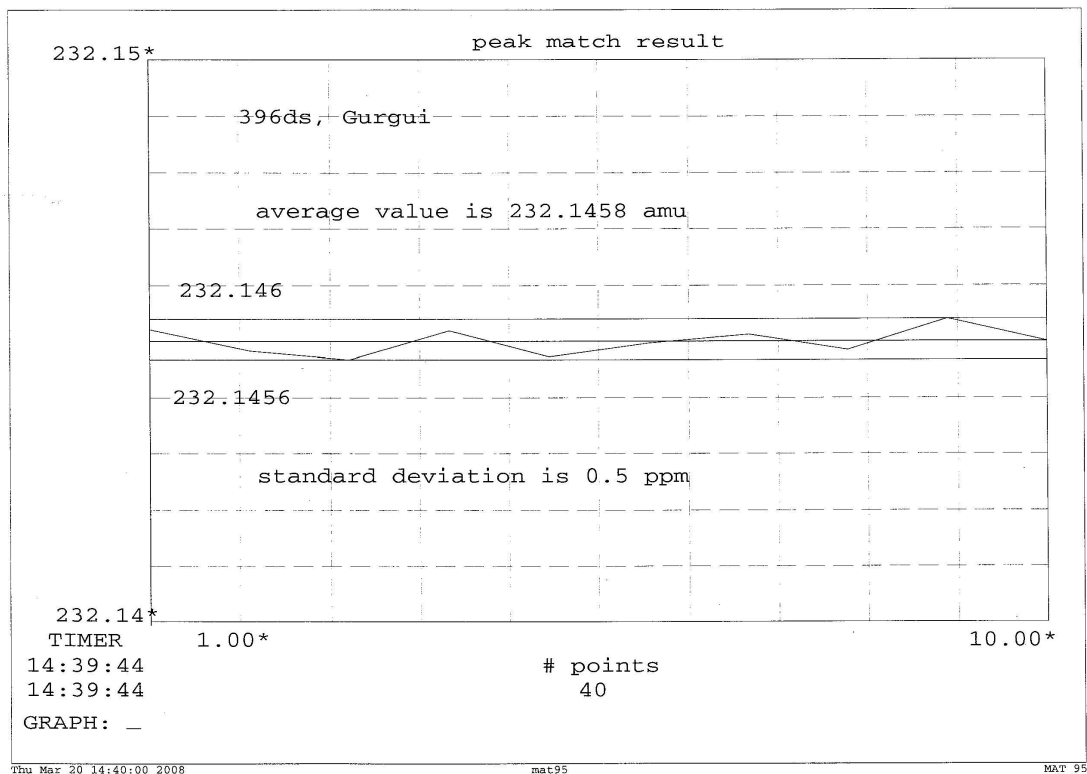

Figure S14. HREIMS for compound 1 (sclerosporin)

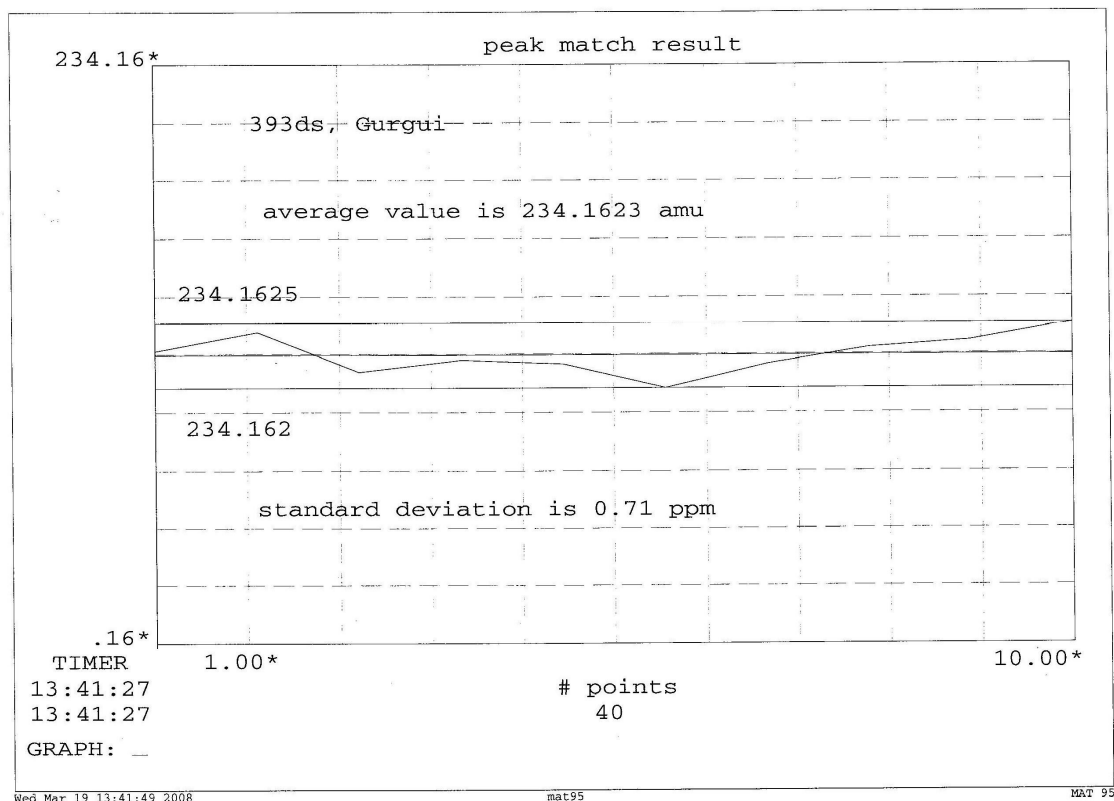

Figure S15. Key HMBC correlations for compounds **2-5**

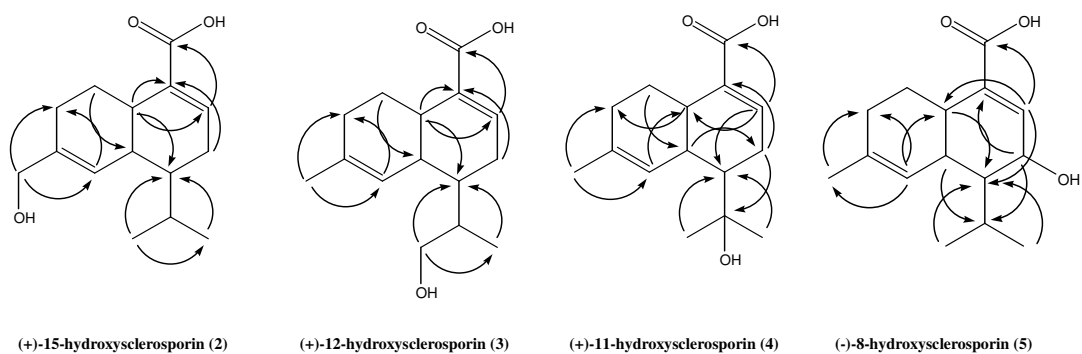

Figure S16. Key NOESY correlations for compounds **2-5**

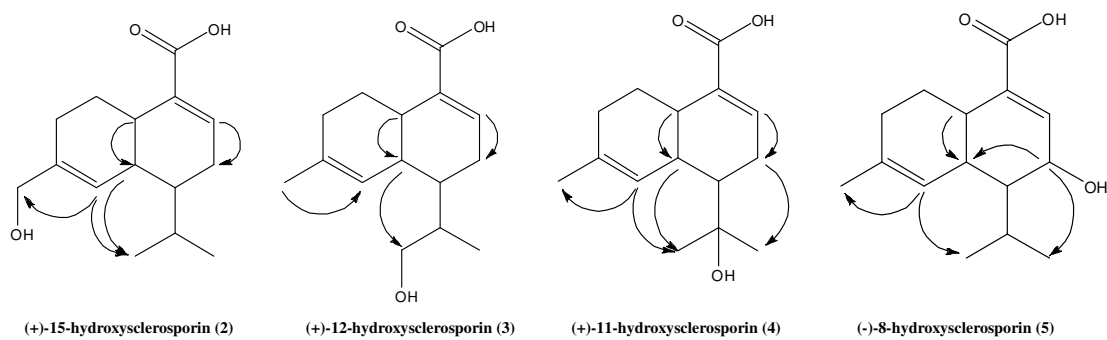

Figures S17. CD spectra for compounds **1-5**; respective absolute configuration on the right side.

Compound **2**, (+)-15-hydroxysclerosporin

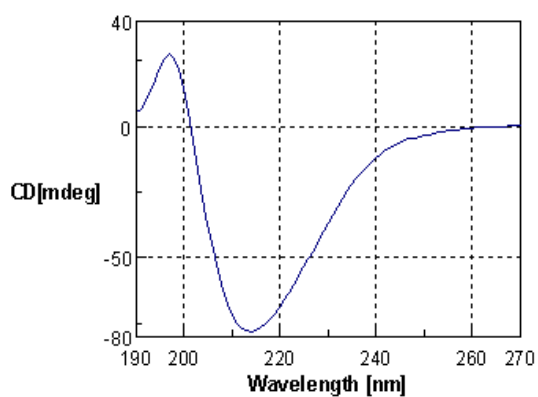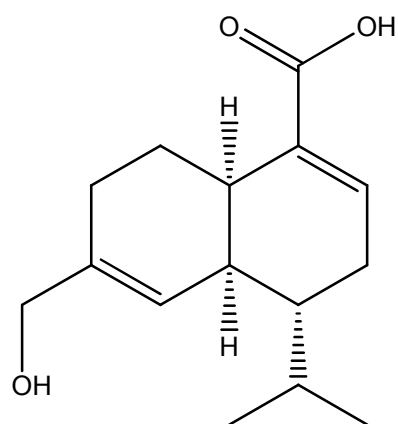

Compound **3**, (+)-12-hydroxysclerosporin

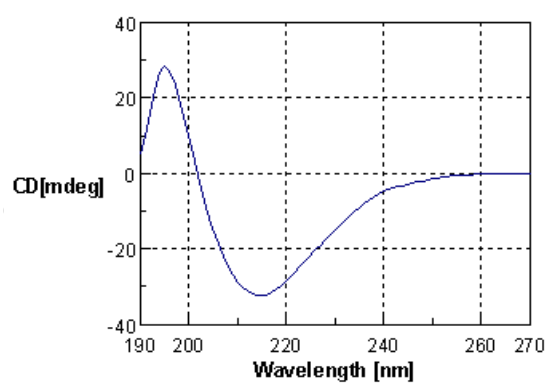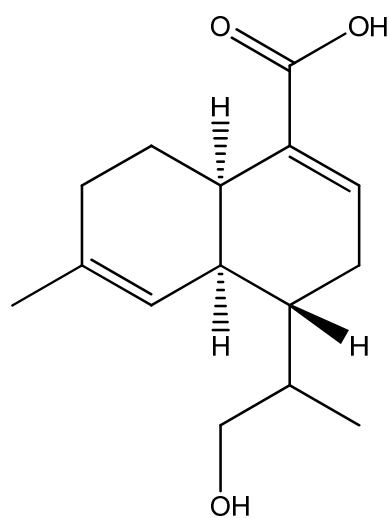

Compound **4**, (+)-11-hydroxysclerosporin

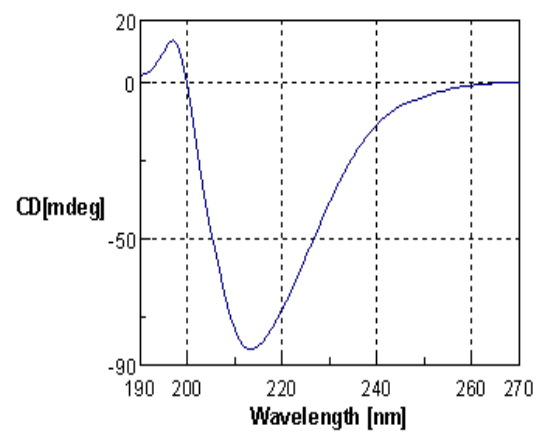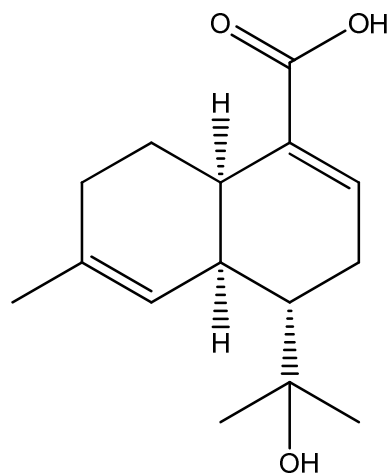

Compound **5**, (-)-8-hydroxysclerosporin

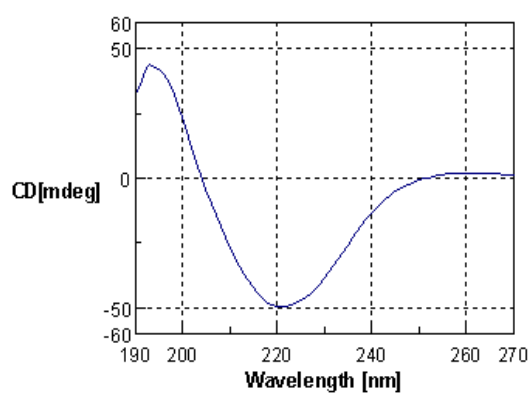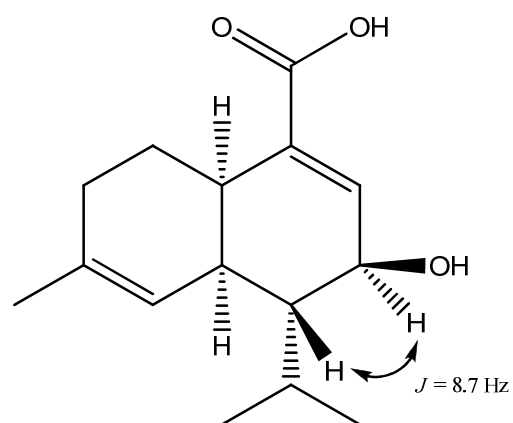

Compound **1**, (+)-sclerosporin

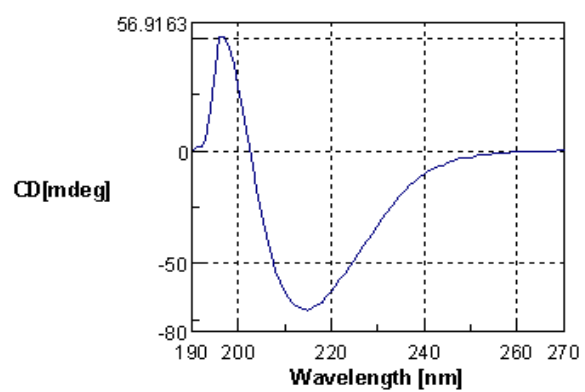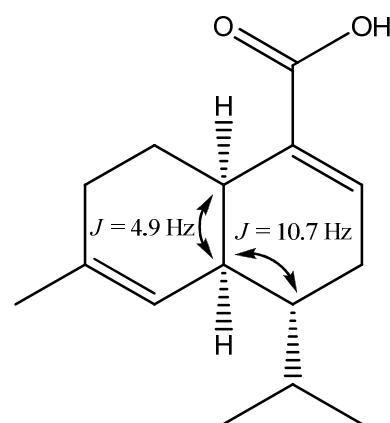

Figure S18. Isolation scheme for compounds 1- 5.

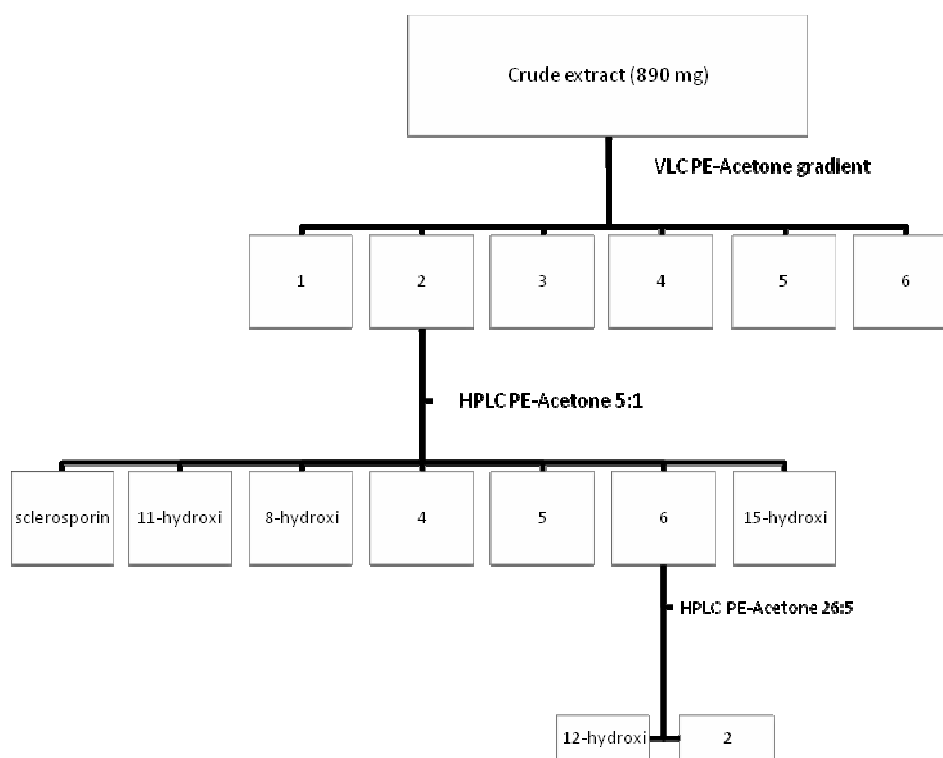

Table S19 a and b. Data of the 3T3-L1 murine adipocytes assay for compound **5**  
 (IC<sub>50</sub> values are the mean of quadruplicate determinations; blue numbers refer to the indicated concentrations (µg/mL) used of tested compounds; Arterenol was used as control for activity comparison)

**A:**

| Sample Name       | Triglyceride Accumulation (% of control) |     |     | IC <sub>50</sub><br>(µg/mL) |
|-------------------|------------------------------------------|-----|-----|-----------------------------|
|                   | 100                                      | 20  | 4   |                             |
| Compound <b>5</b> | 26                                       | 133 | 117 | 53 ± 1                      |
| (-)-Arterenol     | 33                                       | 64  | 71  | 69 ± 4                      |

**B:**

| Sample Name       | Cell Number of 3T3-L1 (% of control) |     |     | IC <sub>50</sub><br>(µg/mL) |
|-------------------|--------------------------------------|-----|-----|-----------------------------|
|                   | 100                                  | 20  | 4   |                             |
| Compound <b>5</b> | 46                                   | 79  | 82  | 76                          |
| (-)-Arterenol     | 69                                   | 102 | 123 | > 100                       |

Table S20. 1D and 2D NMR Spectroscopic Data for Compound 2 [(+)-15-hydroxysclerosporin]

| Position | $\delta_C$ , mult. <sup>a, b, e</sup> | $\delta_H^{a, b}$ ( <i>J</i> in Hz)   | COSY <sup>a, c</sup> | HMBC <sup>a, d</sup>               | NOESY <sup>a, c</sup> |
|----------|---------------------------------------|---------------------------------------|----------------------|------------------------------------|-----------------------|
| 1        | 34.0, CH                              | 2.58, br d (11.4)                     | 2a, 2b, 6            | 6, 7, 9, 10                        | 6                     |
| 2        | 25.1, CH <sub>2</sub>                 | a: 1.99, m<br>b: 1.37, qd (11.4, 5.4) | 1, 2b, 3<br>1, 2a, 3 | 1, 3, 6<br>1, 3, 6                 | 2b<br>2a, 7           |
| 3        | 26.2, CH <sub>2</sub>                 | 2.08, m                               | 2a, 2b               | 4, 5                               |                       |
| 4        | 138.3, qC                             |                                       |                      |                                    |                       |
| 5        | 124.3, CH                             | 5.79, d (4.1)                         | 6, 15                | 1, 3, 6, 15                        | 6, 12, 15             |
| 6        | 35.5, CH                              | 2.04, m                               | 1, 5, 7              | 1                                  | 1, 8a, 12             |
| 7        | 40.0, CH                              | 1.53, tt (10.2, 5.1)                  | 6, 8a, 8b            | 6, 11, 12, 13                      | 2b, 11                |
| 8        | 25.4, CH <sub>2</sub>                 | a: 2.15, dt (19.8, 5.1)<br>b: 1.97, m | 7, 8b, 9<br>7, 8a, 9 | 6, 7, 9, 10, 14<br>6, 7, 9, 10, 14 | 8b, 9<br>8a, 9        |
| 9        | 142.6, CH                             | 7.14, br s                            | 8a, 8b               | 1, 7, 8, 10, 14                    | 8a, 8b                |
| 10       | 132.9, qC                             |                                       |                      |                                    |                       |
| 11       | 26.4, CH                              | 2.03, m                               | 7, 12, 13            | 12, 13                             | 12, 13                |
| 12       | 15.0, CH <sub>3</sub>                 | 0.83, d (6.8)                         | 11                   | 7, 11, 13                          | 5, 11                 |
| 13       | 21.3, CH <sub>3</sub>                 | 0.90, d (6.8)                         | 11                   | 7, 11, 12                          | 11                    |
| 14       | 172.2, qC                             |                                       |                      |                                    |                       |
| 15       | 67.3, CH <sub>2</sub>                 | 4.03, br s                            | 5                    | 3, 4, 5                            | 5                     |

<sup>a</sup>CDCl<sub>3</sub>, 300/75.5 MHz. <sup>b</sup> Assignments are based on extensive 1D and 2D NMR experiments (HMBC, HSQC, COSY). <sup>c</sup> Numbers refer to proton resonances. <sup>d</sup> Numbers refer to carbon resonances. <sup>e</sup> Implied multiplicities determined by DEPT.

Table S21. 1D and 2D NMR Spectroscopic Data for Compound **3** [(+)-12-hydroxysclerosporin]

| Position | $\delta_C$ , mult <sup>a, b, e</sup> | $\delta_H$ <sup>a, b</sup> ( <i>J</i> in Hz) | COSY <sup>a, c</sup>           | HMBC <sup>a, d</sup>       | NOESY <sup>a, c</sup>  |
|----------|--------------------------------------|----------------------------------------------|--------------------------------|----------------------------|------------------------|
| 1        | 33.8, CH                             | 2.58, br d (10.2)                            | 2a, 2b, 6                      | 3                          | 6                      |
| 2        | 25.4, CH <sub>2</sub>                | a: 1.91, m<br>b: 1.42, qd (11.7, 5.4)        | 1, 2b, 3a, 3b<br>1, 2a, 3a, 3b | 1, 6<br>1,6                | 2b<br>2a, 7            |
| 3        | 30.3, CH <sub>2</sub>                | a: 2.06, m<br>b: 1.88, m                     | 2a, 2b, 3b<br>2a, 2b, 3a       |                            | 3b<br>2b, 3a           |
| 4        | 135.6, qC                            |                                              |                                |                            |                        |
| 5        | 123.0, CH                            | 5.52, br s                                   | 6, 15                          | 1, 3, 6, 15                | 6, 12a, 12b, 15        |
| 6        | 35.8, CH                             | 2.10, m                                      | 1, 5                           | 8                          | 1, 5                   |
| 7        | 38.6, CH                             | 1.65, tt (10.2, 5.1)                         | 6, 8a, 8b                      | 11, 12                     | 2b, 11                 |
| 8        | 28.0, CH <sub>2</sub>                | a: 2.27, dt (19.8, 5.1)<br>b: 2.02, m        | 7, 8b<br>7, 8a, 9              | 6, 7, 9, 10<br>6, 7, 9, 10 | 8b, 9<br>8a, 9         |
| 9        | 142.1, CH                            | 7.10, br s                                   | 8a, 8b                         | 1, 7, 8, 10, 14            | 8a, 8b                 |
| 10       | 133.1, qC                            |                                              |                                |                            |                        |
| 11       | 35.3, CH                             | 2.05, m                                      | 7, 12a, 12b, 13                |                            | 7                      |
| 12       | 64.9, CH <sub>2</sub>                | a: 3.77 (dd, 4.8, 10.6)<br>b: 3.52, t (10.6) | 11, 12b<br>11, 12a             | 7, 11, 13<br>7, 11, 13     | 5, 6, 12b<br>5, 6, 12a |
| 13       | 15.4, CH <sub>3</sub>                | 1.03, d (7.0)                                | 11                             | 7, 11, 12                  | 11                     |
| 14       | 172.0, qC                            |                                              |                                |                            |                        |
| 15       | 23.9, CH <sub>3</sub>                | 1.68, br s                                   | 5                              | 3, 4, 5                    | 5                      |

<sup>a</sup>CDCl<sub>3</sub>, 300/75.5 MHz. <sup>b</sup> Assignments are based on extensive 1D and 2D NMR experiments (HMBC, HSQC, COSY). <sup>c</sup> Numbers refer to proton resonances. <sup>d</sup> Numbers refer to carbon resonances. <sup>e</sup> Implied multiplicities determined by DEPT.



Table S22. 1D and 2D NMR Spectroscopic Data for Compound **4** [(+)-11-hydroxysclerosporin]

| Position | $\delta_C$ , mult. <sup>a, b, e</sup> | $\delta_H$ <sup>a, b</sup> ( <i>J</i> in Hz) | COSY <sup>a, c</sup>           | HMBC <sup>a, d</sup> | NOESY <sup>a, c</sup> |
|----------|---------------------------------------|----------------------------------------------|--------------------------------|----------------------|-----------------------|
| 1        | 35.6, CH                              | 2.54, br d (10.6)                            | 2a, 2b, 6                      |                      | 6                     |
| 2        | 26.2, CH <sub>2</sub>                 | a: 1.89, m<br>b: 1.50, qd (11.7, 5.5)        | 1, 2b, 3a, 3b<br>1, 2a, 3a, 3b | 1, 6                 | 2b<br>2a, 7           |
| 3        | 30.8, CH <sub>2</sub>                 | a: 1.98, m<br>b: 1.95, m                     | 2a, 2b<br>2a, 2b               |                      |                       |
| 4        | 133.7, qC                             |                                              |                                |                      |                       |
| 5        | 126.6, CH                             | 5.71, br d (5.1)                             | 6, 15                          | 1, 3, 6, 15          | 6, 12, 15             |
| 6        | 36.9, CH                              | 2.11, m                                      | 1, 5                           | 5, 7, 8              | 1, 5, 12              |
| 7        | 47.2, CH                              | 1.68, td (10.3, 5.1)                         | 8a, 8b                         | 6, 11                | 2b, 8a, 12, 13        |
| 8        | 29.7, CH <sub>2</sub>                 | a: 2.38, dt (19.6, 5.1)<br>b: 2.01, m        | 7, 8b, 9<br>7, 8a, 9           | 6, 7, 9, 10, 11      | 7, 8b, 9, 13<br>8a, 9 |
| 9        | 140.2, CH                             | 6.95, br t (3.9)                             | 8a, 8b                         | 1, 7, 8, 10, 14      | 8a, 8b                |
| 10       | 134.3, qC                             |                                              |                                |                      |                       |
| 11       | 72.6, qC                              |                                              |                                |                      |                       |
| 12       | 27.4, CH <sub>3</sub>                 | 1.23, s                                      |                                | 7, 11, 13            | 5                     |
| 13       | 28.7, CH <sub>3</sub>                 | 1.18, s                                      |                                | 7, 11, 12            |                       |
| 14       | 168.0, qC                             |                                              |                                |                      |                       |
| 15       | 23.9, CH <sub>3</sub>                 | 1.66, br s                                   | 5                              | 3, 4, 5              | 5                     |

<sup>a</sup>Acetone-*d*<sub>6</sub>, 300/75.5 MHz. <sup>b</sup> Assignments are based on extensive 1D and 2D NMR experiments (HMBC, HSQC, COSY). <sup>c</sup> Numbers refer to proton resonances. <sup>d</sup> Numbers refer to carbon resonances. <sup>e</sup> Implied multiplicities determined by DEPT.

Table S23. 1D and 2D NMR Spectroscopic Data for Compound **5** [(-)-8-hydroxysclerosporin]

| Position | $\delta_C$ , mult. <sup>a, b, e</sup> | $\delta_H$ <sup>a, b</sup> ( <i>J</i> in Hz) | COSY <sup>a, c</sup>           | HMBC <sup>a, d</sup> | NOESY <sup>a, c</sup> |
|----------|---------------------------------------|----------------------------------------------|--------------------------------|----------------------|-----------------------|
| 1        | 35.2, CH                              | 2.43, br d (10.6)                            | 2a, 2b, 6                      | 7                    | 6                     |
| 2        | 26.0, CH <sub>2</sub>                 | a: 1.93, m<br>b: 1.45, qd (11.7, 5.4)        | 1, 2b, 3a, 3b<br>1, 2a, 3a, 3b |                      | 2b<br>2a              |
| 3        | 31.5, CH <sub>2</sub>                 | a: 2.08, m<br>b: 1.93, m                     | 2a, 2b, 3b<br>2a, 2b, 3a       |                      | 3b<br>3a              |
| 4        | 134.9, qC                             |                                              |                                |                      |                       |
| 5        | 125.1, CH                             | 5.57, br d (4.4)                             | 6, 15                          | 1, 3, 6, 15          | 6, 11, 12, 13, 15     |
| 6        | 36.2, CH                              | 2.10, m                                      | 1, 5, 7                        | 1, 7, 11             | 1                     |
| 7        | 48.8, CH                              | 1.52, ddd (3.2, 8.7, 10.7)                   | 6, 8, 11                       | 1, 6, 8              | 12, 13                |
| 8        | 68.7, CH                              | 4.13, br d (8.7)                             | 7, 9                           | 7, 9, 10, 11         | 6, 9, 11, 12, 13      |
| 9        | 143.7, CH                             | 6.79, d (1.8)                                | 8                              | 1, 7, 10, 14         | 8                     |
| 10       | 134.3, qC                             |                                              |                                |                      |                       |
| 11       | 27.3, CH                              | 2.25, m                                      | 7, 12, 13                      | 7, 8                 | 7, 8, 9, 12, 13       |
| 12       | 18.9, CH <sub>3</sub>                 | 1.00, d (7.1)                                | 11                             | 7, 11, 13            | 5, 7, 8, 11           |
| 13       | 21.1, CH <sub>3</sub>                 | 1.10, d (7.1)                                | 11                             | 7, 11, 12            | 5, 7, 8, 11           |
| 14       | 168.0, qC                             |                                              |                                |                      |                       |
| 15       | 23.9, CH <sub>3</sub>                 | 1.68, br s                                   | 5                              | 3, 4, 5              | 5                     |

<sup>a</sup>Acetone-*d*<sub>6</sub>, 300/75.5 MHz. <sup>b</sup> Assignments are based on extensive 1D and 2D NMR experiments (HMBC, HSQC, COSY). <sup>c</sup> Numbers refer to proton resonances. <sup>d</sup> Numbers refer to carbon resonances. <sup>e</sup> Implied multiplicities determined by DEPT.
